# Supplementary material for: Highly coplanar bis(thiazol-2-yl)-diketopyrrolopyrrole based donor–acceptor copolymers for ambipolar field effect transistors
Source: Royal Society of Chemistry journal article supplement (doi:10.1039/c6ra17241e), 2016-01-01

## Supporting Information

# Highly coplanar bis(thiazol-2-yl)-diketopyrrolopyrrole based donor-acceptor copolymers for ambipolar field effect transistors

Dong Gao,<sup>†ab</sup> Zhihui Chen,<sup>†ab</sup> Zupan Mao,<sup>a</sup> Jianyao Huang,<sup>a</sup> Weifeng Zhang,<sup>a</sup> Dizao Li<sup>a</sup> and Gui Yu<sup>\*ab</sup>

<sup>a</sup>Beijing National Laboratory for Molecular Sciences, Institute of Chemistry, Chinese Academy of Sciences, Beijing 100190, P. R. China

<sup>b</sup>University of Chinese Academy of Sciences, Beijing 100049, P. R. China.

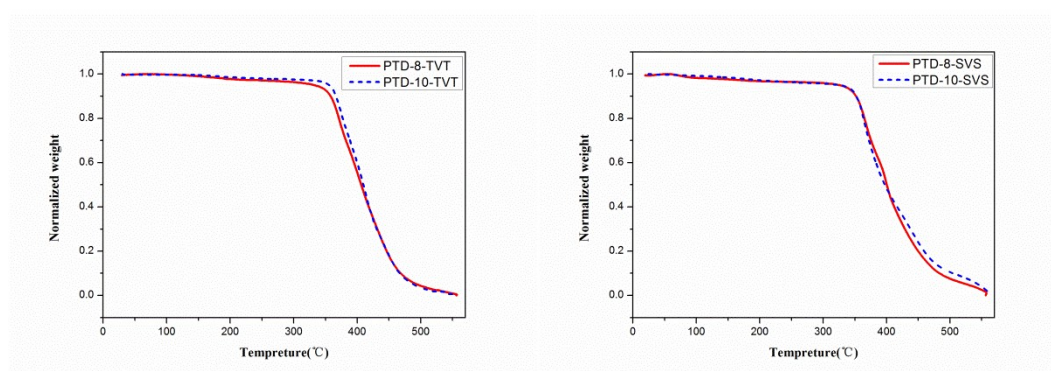

**Figure S1.** TGA curves of the TZDPP-based polymers.

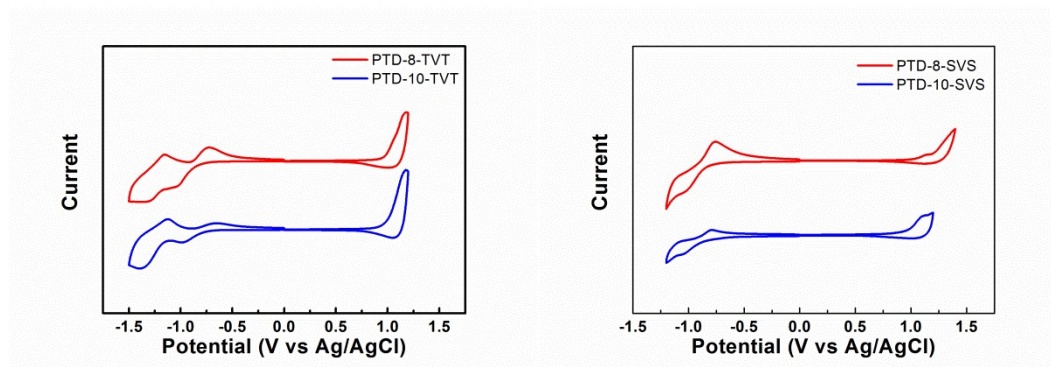

**Figure S2.** Cyclic voltammogram of polymer thin films.

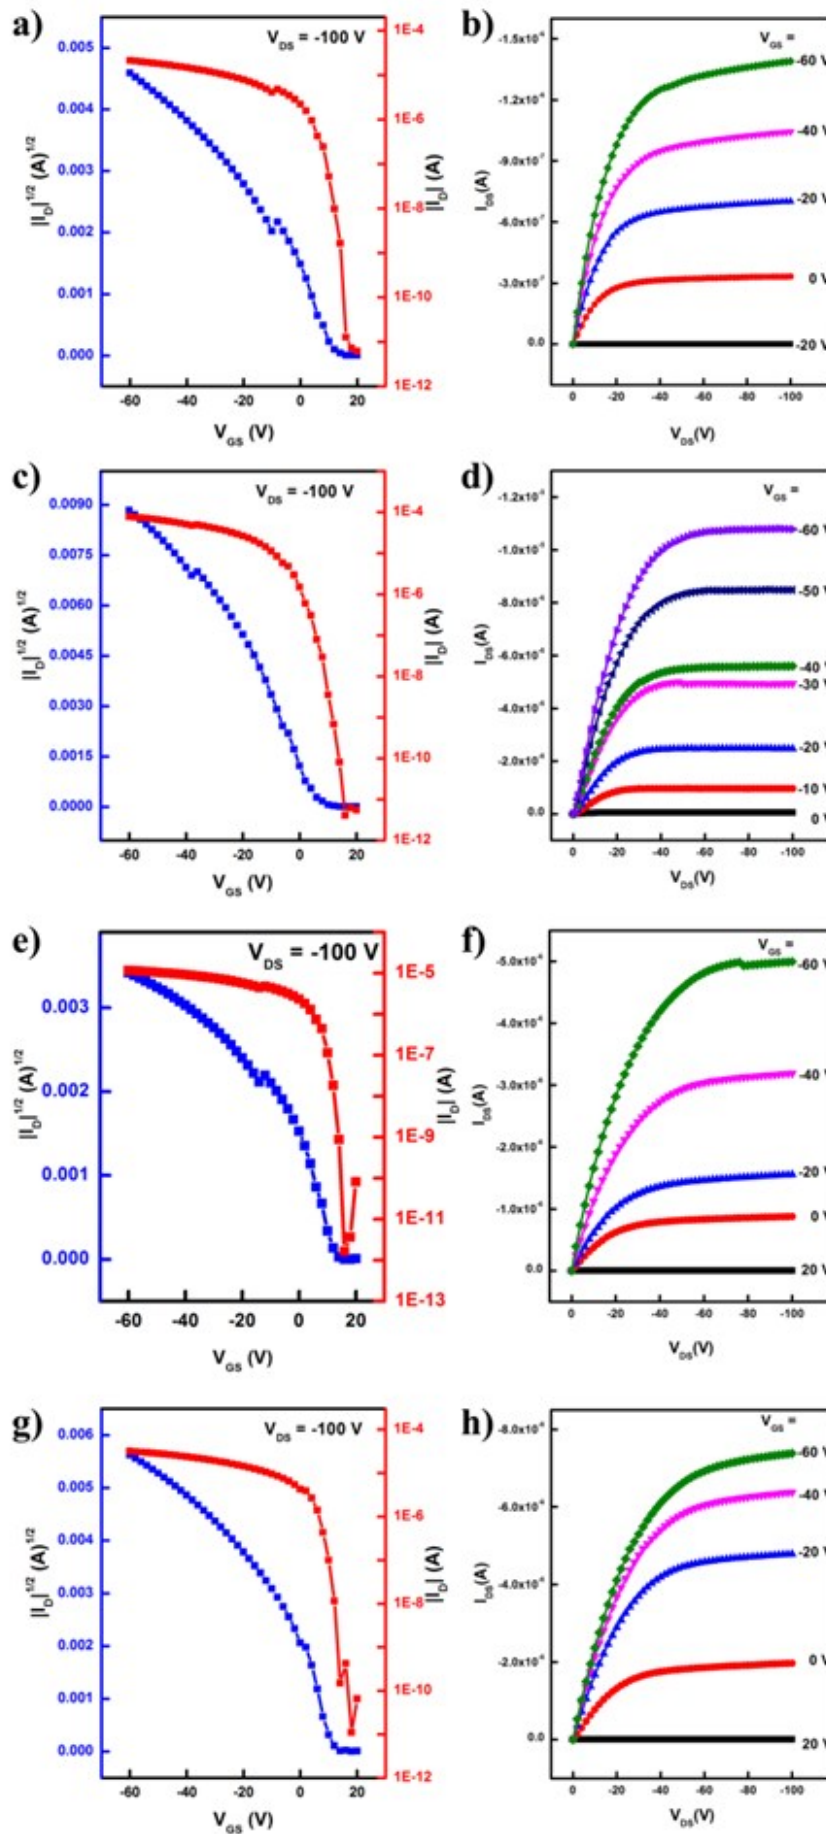

**Figure S3.** Typical transfer (left) and output (right) curves of BGBC PFET devices based on a) PTD-8-TVT; c) PTD-10-TVT; e) PTD-8-SVS; g) PTD-10-SVS thin films.

**Table S1.** The properties of PFET devices with BGBC configurations

| Polymer    | $\mu$ (cm <sup>2</sup> V <sup>-1</sup> s <sup>-1</sup> ) |       | $I_{on}/I_{off}$                 |
|------------|----------------------------------------------------------|-------|----------------------------------|
|            | average                                                  | max   |                                  |
| PTD-8-TVT  | 0.046                                                    | 0.049 | 10 <sup>6</sup> –10 <sup>7</sup> |
| PTD-10-TVT | 0.32                                                     | 0.39  | 10 <sup>6</sup> –10 <sup>9</sup> |
| PTD-8-SVS  | 0.12                                                     | 0.13  | 10 <sup>6</sup> –10 <sup>7</sup> |
| PTD-10-SVS | 0.34                                                     | 0.38  | 10 <sup>6</sup> –10 <sup>7</sup> |

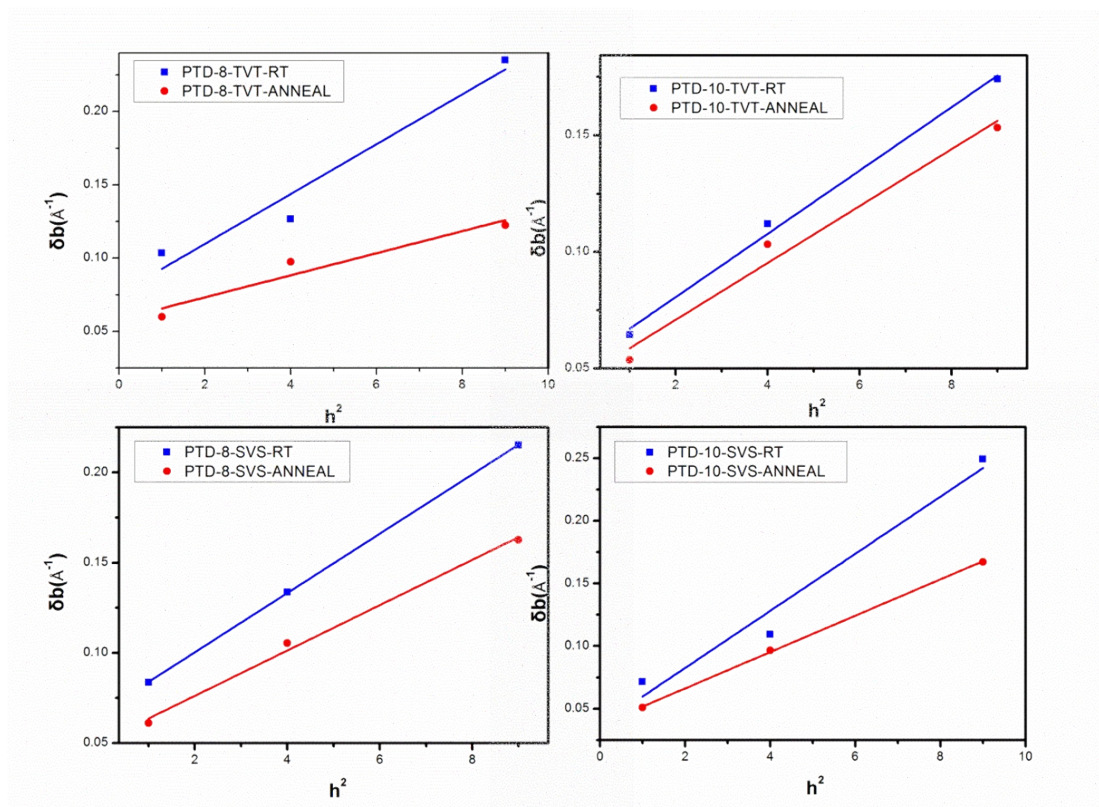

**Figure S4.**  $\delta b$ - $h^2$  plots extracted from the 2D GIXD analysis of the polymer thin films.

# <sup>1</sup>H NMR spectra:

PTD-8-TVT:

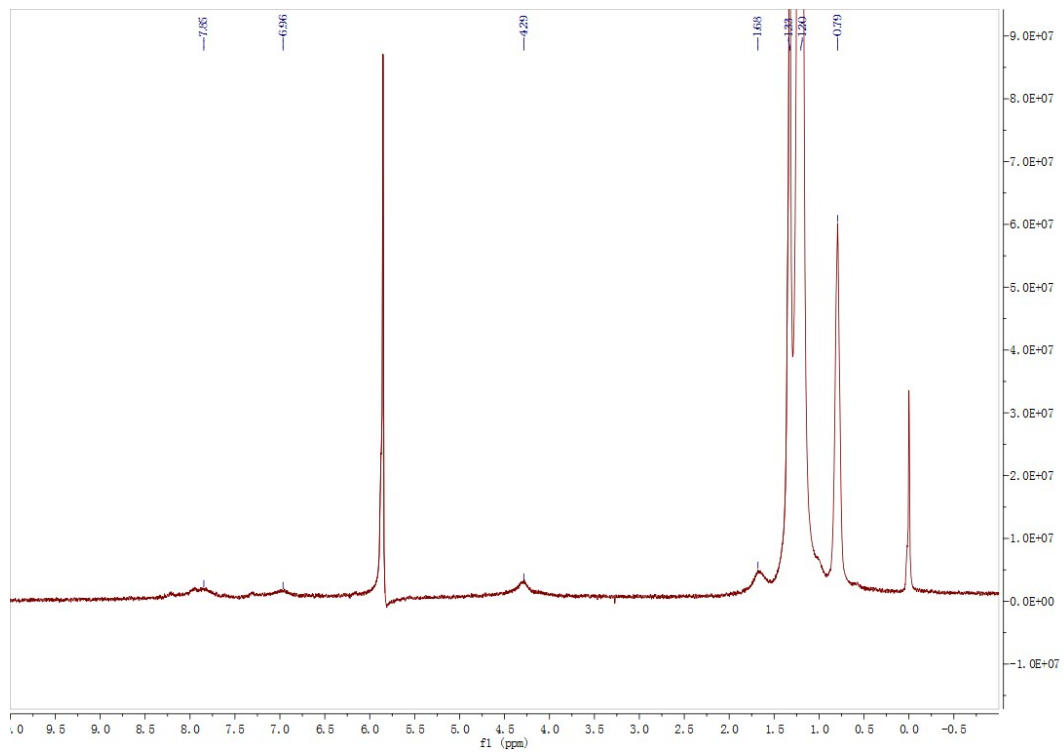

PTD-10-TVT:

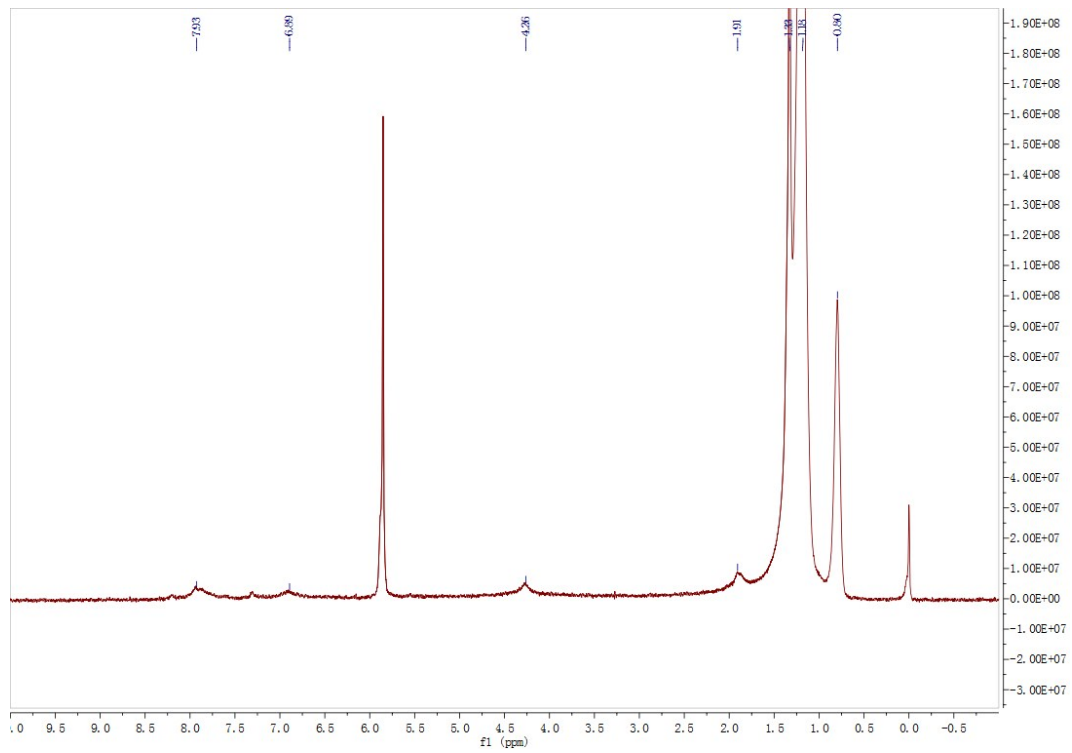

PTD-8-SVS:

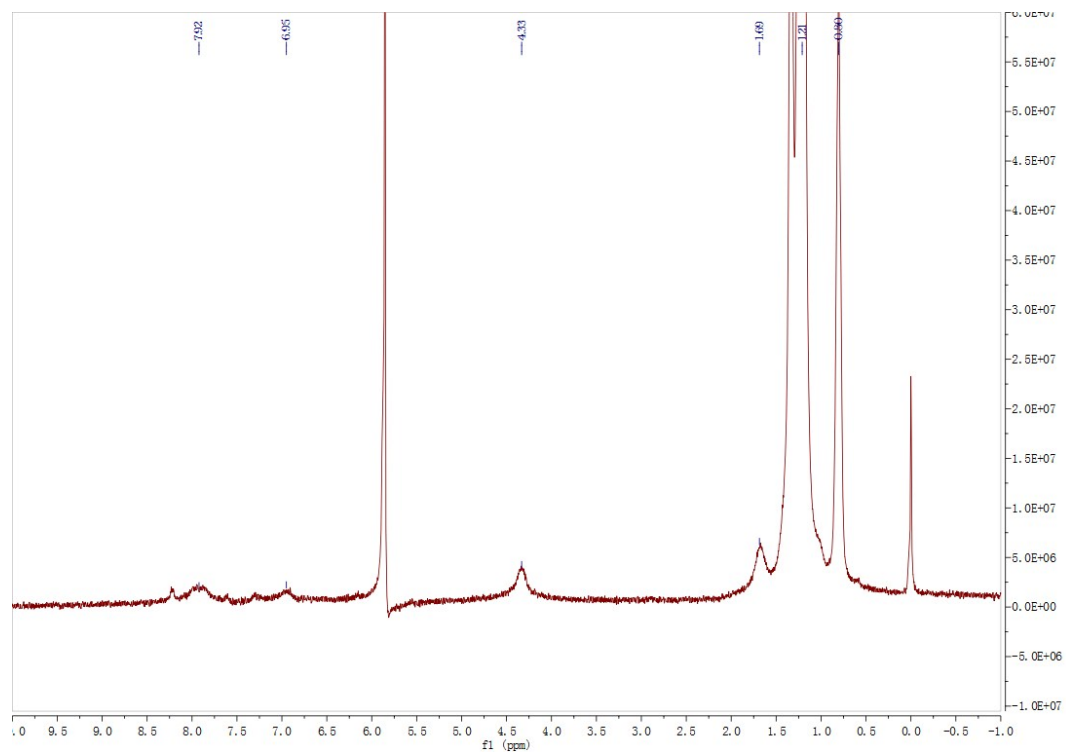

PTD-10-SVS:

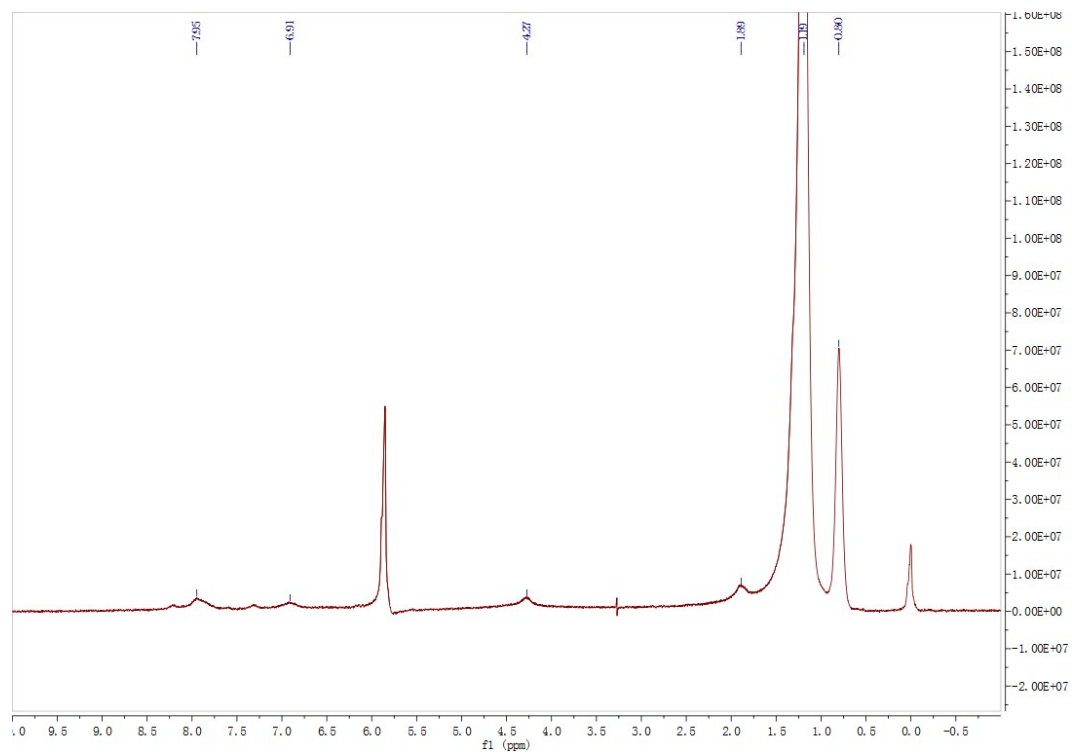

Supplement: c6ra17241e1.pdf [file c6ra17241e1.pdf]
